# Supplementary material for: Confining MoS2 nanodots in compact layered graphene blocks for high volumetric capacity, fast, and stable sodium storage
Source: Royal Society of Chemistry journal article supplement (doi:10.1039/d2ta05935e), 2022-01-01
Supplement: d2ta05935e1.pdf [file d2ta05935e1.pdf]

## Supplementary Information

### **Confining MoS<sub>2</sub> Nanodots into Compact Layered Graphene Blocks for High Volumetric Capacity, Fast, and Stable Sodium Storage**

*Shichuan Liang,<sup>a</sup> Su Zhang,<sup>\*b</sup> Zheng Liu,<sup>b</sup> Jing Feng,<sup>a</sup> Yuting Jiang,<sup>a</sup> Mingming Gao,<sup>a</sup> Di Geng,<sup>a</sup> Tong Wei,<sup>\*a, b</sup> and Zhuangjun Fan,<sup>\*a, b</sup>*

*<sup>a</sup>Key Laboratory of Superlight Materials and Surface Technology, Ministry of Education; College of Materials Science and Chemical Engineering, Harbin Engineering University, Harbin 150001, P. R. China*

*<sup>b</sup>State Key Laboratory of Heavy Oil Processing, School of Materials Science and Engineering, China University of Petroleum, Qingdao 266580, P. R. China.*

*\* Corresponding author: fanzhj666@163.com (Z. Fan); suzhangs@163.com (S. Zhang); weitong666@163.com (T. Wei)*

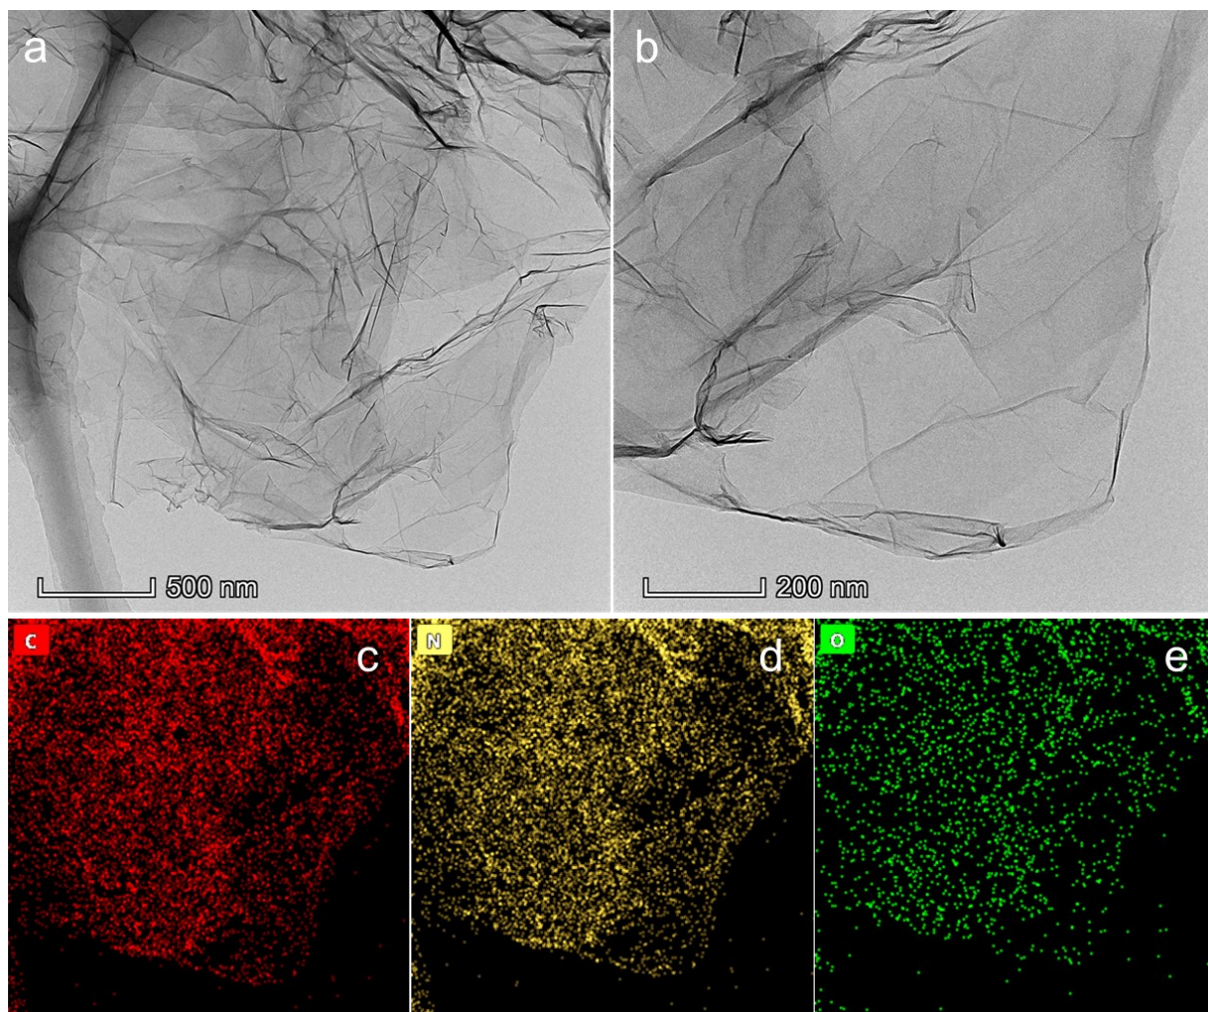

Fig. S1. (a, b) TEM images of PANI@GO, and the corresponding element mappings of (c) carbon, (d) nitrogen, and (e) oxygen elements.

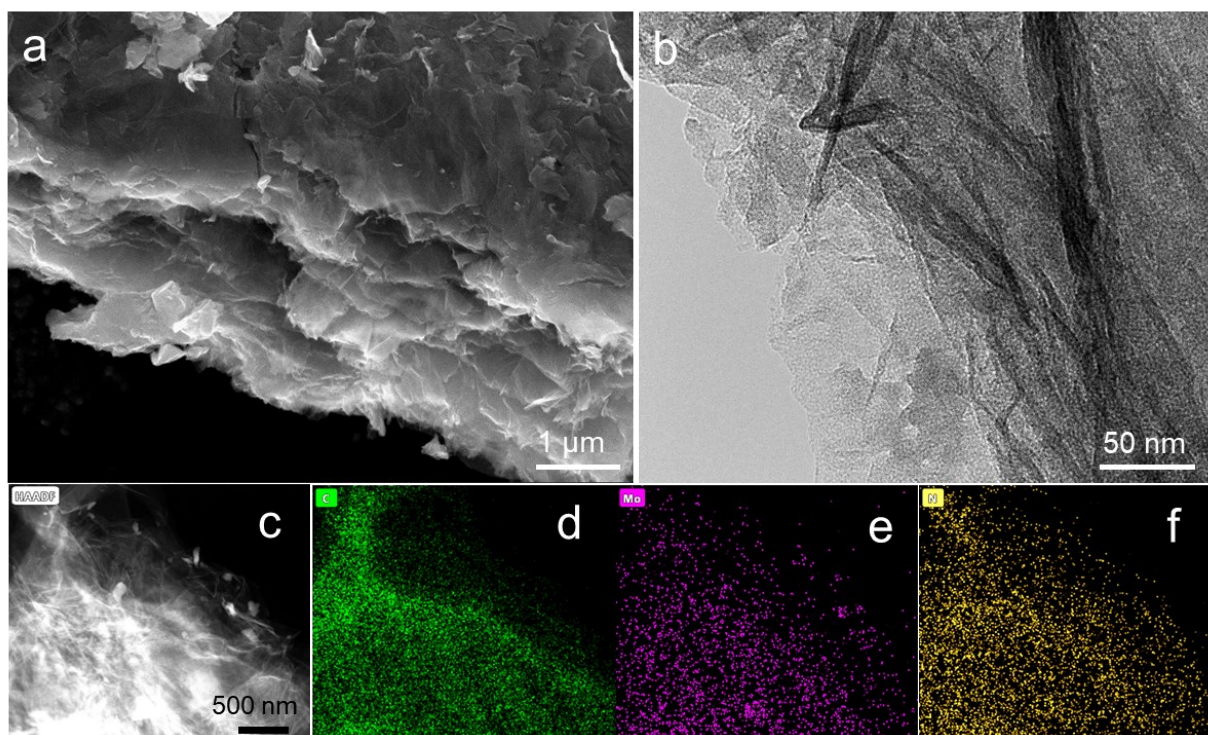

Fig. S2. (a) SEM image, (b) TEM image, (c) high-angle annular dark-field image, and the corresponding element mappings of (d) C, (e) Mo, and (f) N elements for DNG/MoS<sub>2</sub>.

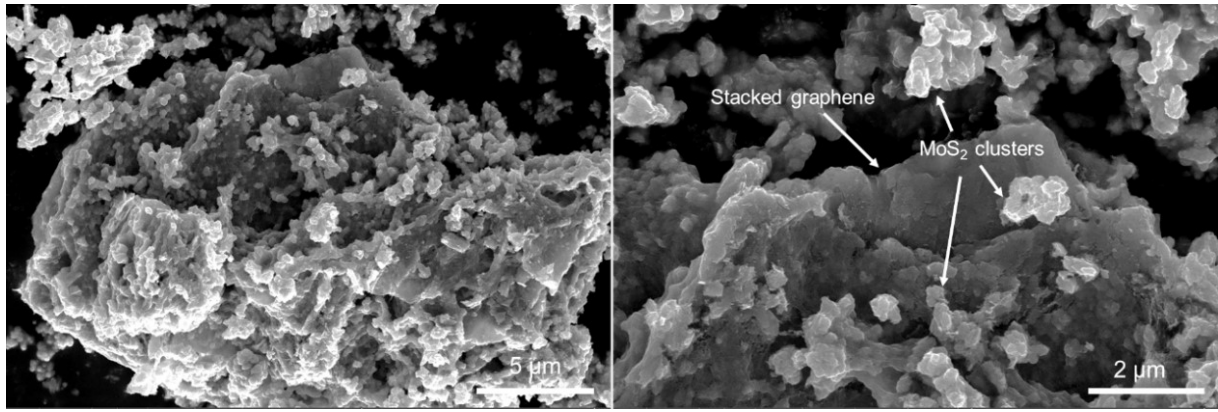

Fig. S3. SEM images of G/MoS<sub>2</sub>.

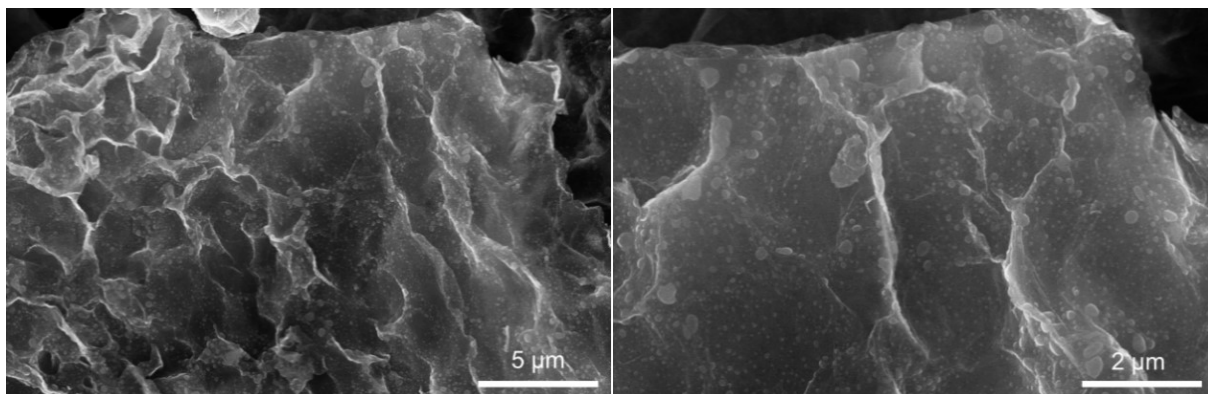

Fig. S4. SEM images of NG/MoS<sub>2</sub>.

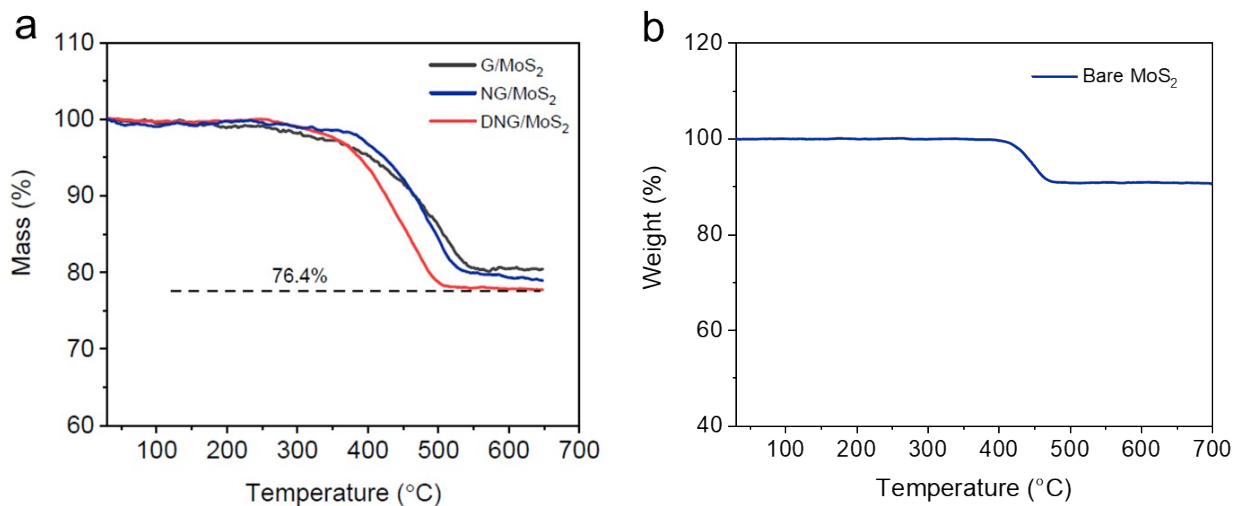

Fig. S5. (a) Thermogravimetric analysis of DNG/MoS<sub>2</sub>, NG/MoS<sub>2</sub>, and G/MoS<sub>2</sub>, showing the remained weight percentage of 76.4%, 77.9%, and 79.8%, respectively. (b) Thermogravimetric analysis of bare MoS<sub>2</sub>, showing the oxidation temperature of 400°C. For the detailed calculation of weight percentage of MoS<sub>2</sub> in DNG/MoS<sub>2</sub>, G/MoS<sub>2</sub>, and NG/MoS<sub>2</sub>, set the initial DNG/MoS<sub>2</sub> mass is  $m$ , the MoS<sub>2</sub> weight percentage is  $x$ . Thus, the molar content of MoS<sub>2</sub> is  $mx/160$ . According to the TG curves, the remained mass percentage of MoO<sub>3</sub> is 76.4%, the molar content of MoO<sub>3</sub> is  $76.4\% \times m/144$ . Since the Mo atom doesn't disappear during the transformation from MoS<sub>2</sub> to MoO<sub>3</sub>, leading to the equal of molar quantity between MoS<sub>2</sub> and MoO<sub>3</sub>, i.e.,  $\frac{mx}{160} = \frac{76.4\% \times m}{144}$ . Therefore, the weight percentage of MoS<sub>2</sub> in DNG/MoS<sub>2</sub> is calculated to be 84.9%. Similarly, the mass content of MoS<sub>2</sub> in G/MoS<sub>2</sub> and NG/MoS<sub>2</sub> are calculated to be 86.5% and 88.7%, respectively.



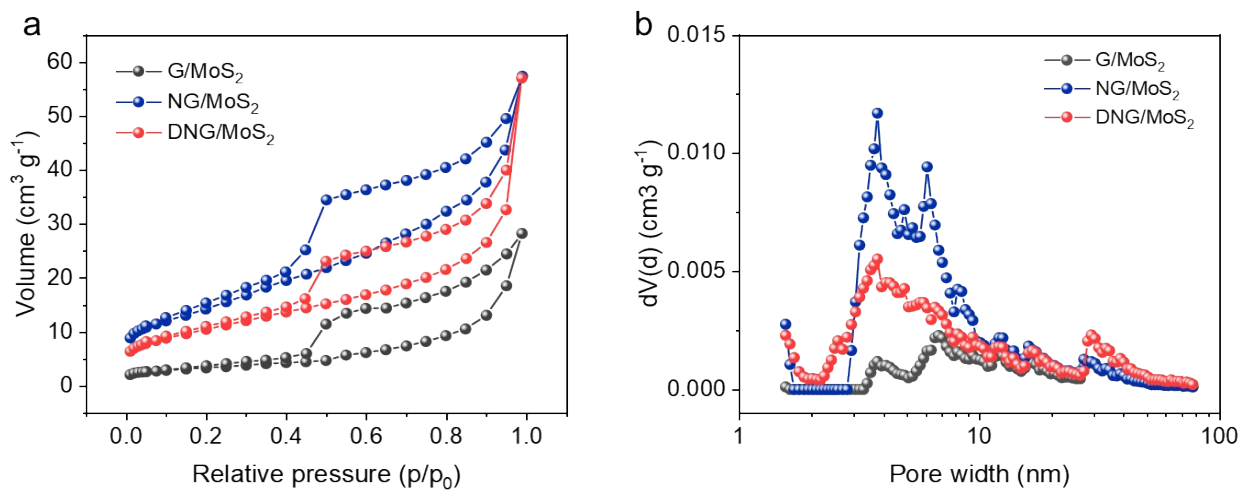

Fig. S6. N<sub>2</sub> adsorption-desorption isotherms for (a) G/MoS<sub>2</sub> and (b) NG/MoS<sub>2</sub>.

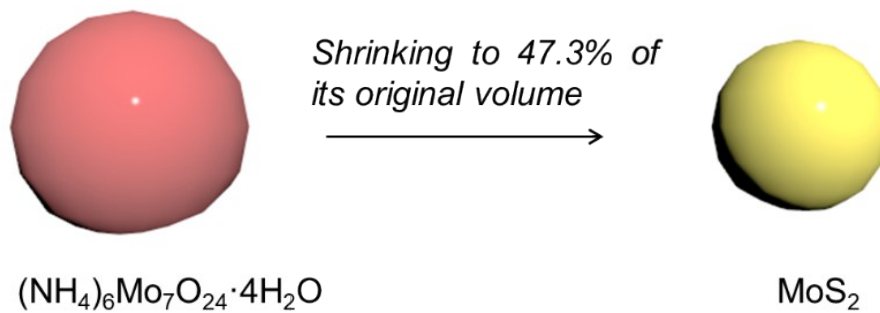

Fig. S7. Schematical illustration of volume shrinkage of  $(\text{NH}_4)_6\text{Mo}_7\text{O}_{24}\cdot 4\text{H}_2\text{O}$  to  $\text{MoS}_2$ .  $(\text{NH}_4)_6\text{Mo}_7\text{O}_{24}\cdot 4\text{H}_2\text{O}$  would shrink to 47.3% of its original volume after converted to  $\text{MoS}_2$ .



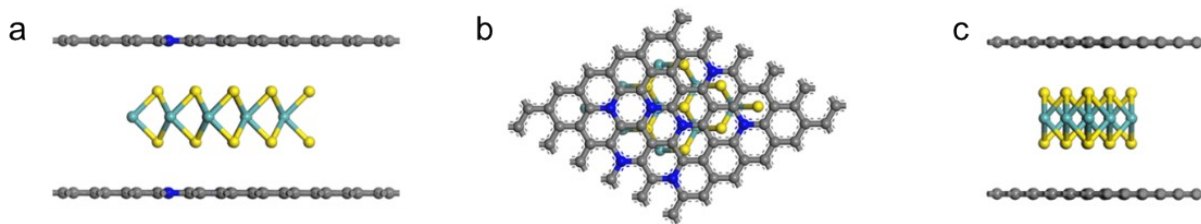

Fig. S8. The front, top, and left views of the initial DNG/MoS<sub>2</sub> model. The density functional theory calculations were carried out with the generalized gradient approximation (GGA) from Perdew-Burke-Ernzerhof (PBE) by using the CASTEP program of Material Studio software. The plane-wave energy cutoff was set to be 517.0 eV with a SCF tolerance of  $1.0 \times 10^{-6}$  eV atom<sup>-1</sup>. The used model is based on the characteristic results of TEM image and XRD pattern, i.e., the small MoS<sub>2</sub> nanodots are distributed between N-doped graphene layers. The 6×6 graphene supercell and 3×3 MoS<sub>2</sub> supercell were used to construct DNG/MoS<sub>2</sub> model. The nitrogen doping type was set as graphitic N. The vacuum distance of graphene was set as 20 Å to avoid the interlayer interaction.

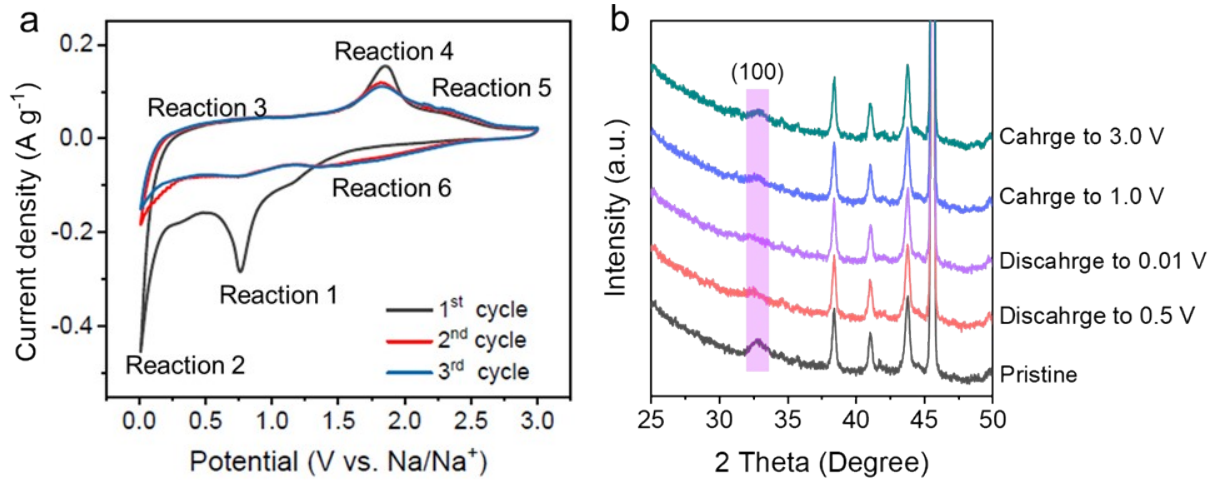

Fig. S9. (a) CV curves of DNG/MoS<sub>2</sub> at 0.1 mV s<sup>-1</sup>. (b) In-situ XRD patterns of DNG/MoS<sub>2</sub> for the first cycle (the sharp peak is correlated to Be in the in-situ XRD equipment). Meanwhile, there is also the accompanying formation of S species because of the insufficient conversion (reaction 5). Thereafter, a peak at 1.8 V in second discharge cycle is correlated to the conversion of S to Na<sub>2</sub>S (reaction 6), which is similar to the mechanism of Na/S batteries.<sup>1,2</sup>

Reaction 1 (interaction, the first discharge):

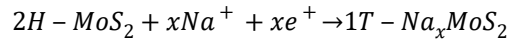

Reaction 2 (conversion, the first discharge):

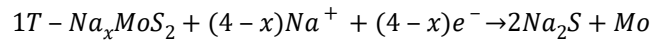

Reaction 3 (deconversion, the first charge):

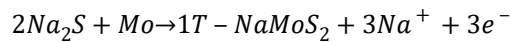

Reaction 4 (deintercalation, the first charge):

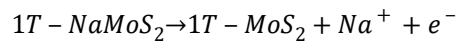

Reaction 5 (deintercalation, the first charge):

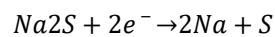

Reaction 6 (deintercalation, the second discharge):

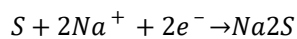

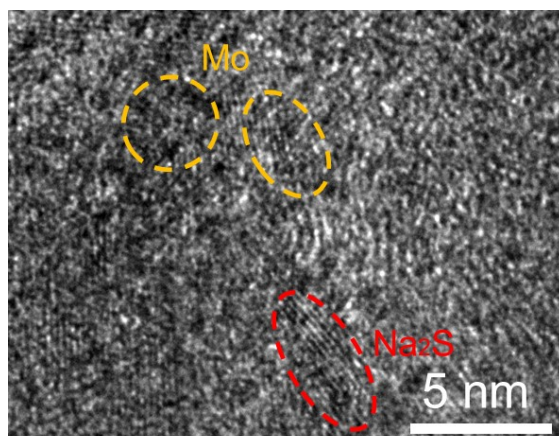

Fig. S10. High-resolution TEM image of DNG/MoS<sub>2</sub> electrode discharged to 0.01 V.

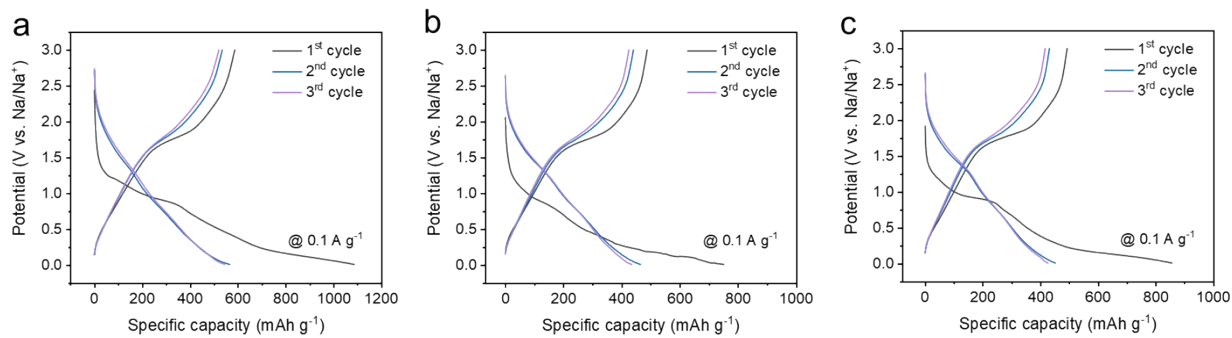

Fig. S11. The charge-discharge curves of DNG/MoS<sub>2</sub>, NG/MoS<sub>2</sub>, and G/MoS<sub>2</sub> at 0.1 A g<sup>-1</sup> for the first three cycles.

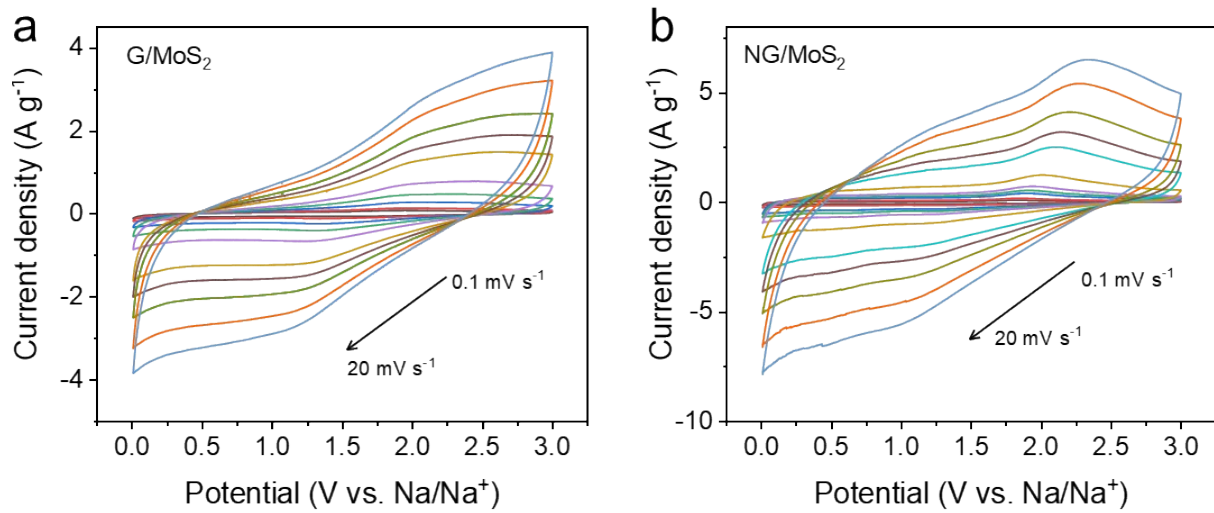

Fig. S12. CV curves at the scan rates from 0.1 to 20 mV s<sup>-1</sup> for (a) G/MoS<sub>2</sub> and (b) NG/MoS<sub>2</sub>.

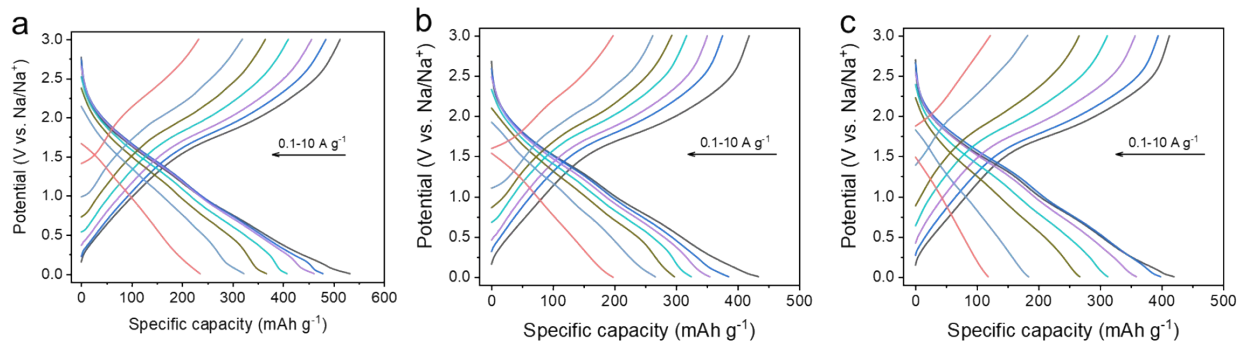

Fig. S13. The charge-discharge curves of DNG/MoS<sub>2</sub>, NG/MoS<sub>2</sub>, and G/MoS<sub>2</sub> at different current densities from 0.1 to 10 A g<sup>-1</sup>.

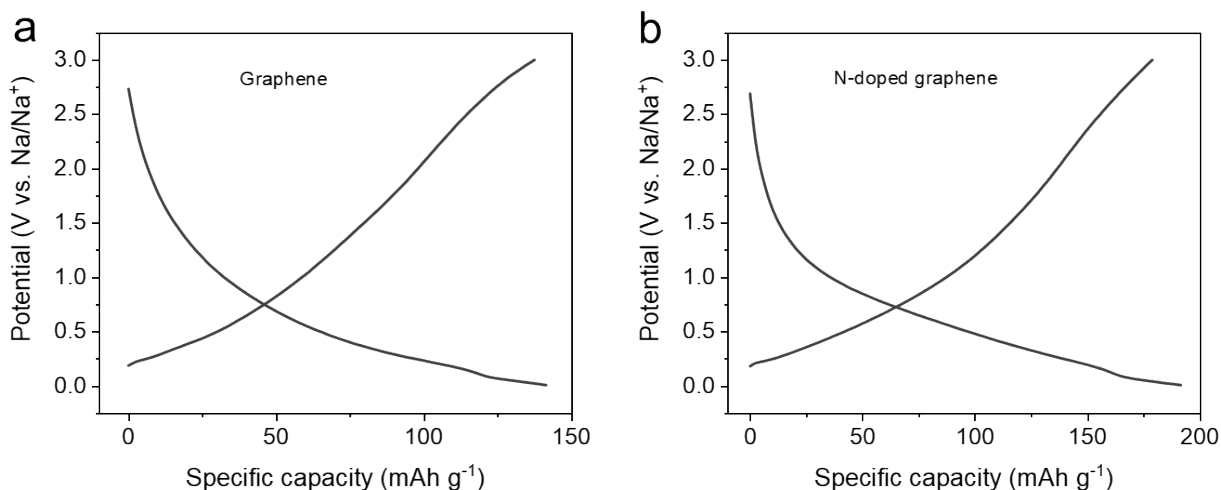

Fig. S14. Discharge-charge profiles of graphene and N-doped graphene at  $0.1 \text{ A g}^{-1}$ . The galvanostatic charge-discharge profiles show the discharge capacities of  $192 \text{ mAh g}^{-1}$  and  $141 \text{ mAh g}^{-1}$  at  $0.1 \text{ A g}^{-1}$  for N-doped graphene and graphene nanosheets, respectively. Taking DNG/MoS<sub>2</sub> as an example, the mass content of MoS<sub>2</sub> is determined to be 84.9 wt.%, i.e., there is 15.1 wt.% of N-doped graphene in DNG/MoS<sub>2</sub>. Based on the equation:

$$C_{NG \text{ in DNG/MoS}_2} = C_{NG} \times M_{NG}$$

where the  $C_{NG}$  and  $M_{NG}$  are capacities delivered by N-doped graphene and mass content of N-doped graphene, respectively.  $C_{NG \text{ in DNG/MoS}_2}$ , the capacity contribution of N-doped graphene in DNG/MoS<sub>2</sub>, is calculated to be  $29 \text{ mAh g}^{-1}$ , which accounts for only 5.6% of DNG/MoS<sub>2</sub> ( $514 \text{ mAh g}^{-1}$  at  $0.1 \text{ A g}^{-1}$ ). The graphene and N-doped graphene contents in G/MoS<sub>2</sub> and NG/MoS<sub>2</sub> are 11.3% and 13.5%, respectively. By the same procedure, the capacity contributions of graphene and N-doped graphene in D/MoS<sub>2</sub> and NG/MoS<sub>2</sub> are calculated to be 16 and 26  $\text{mAh g}^{-1}$ , accounting for only 3.8% and 5.9% in G/MoS<sub>2</sub> and NG/MoS<sub>2</sub>, respectively.



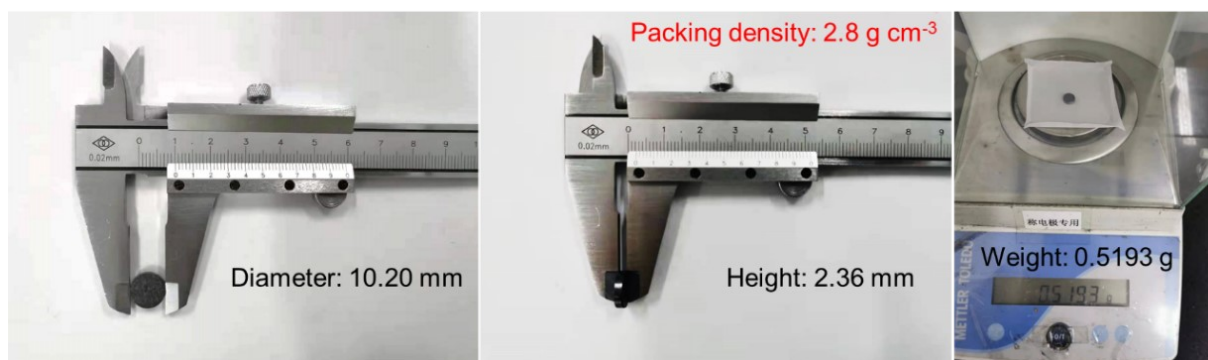

Fig. S15. The optical photographs of the compressed DNG/MoS<sub>2</sub> tablet. DNG/MoS<sub>2</sub> was compressed using a laboratorial hydraulic machine in a FT-IR die under the pressure of 10 MPa, which is equal to the pressure of electrode calendaring.

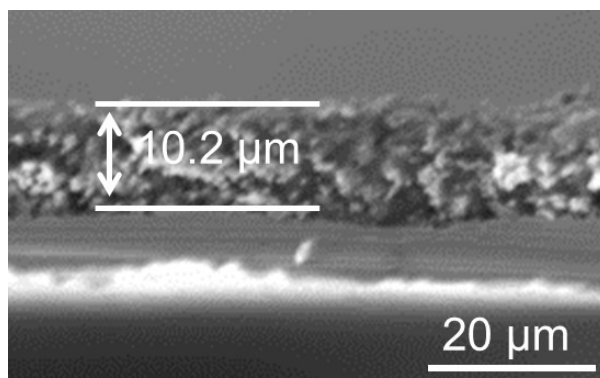

Fig. S16. SEM image of DNG/MoS<sub>2</sub> electrode before sodiation. To calculate the volumetric capacity of the slurry casting electrode, in detail, the thickness ( $h$ ) of slurry casting electrode is 10.2  $\mu\text{m}$ , the area ( $S$ ) is 0.785  $\text{cm}^2$ , the volume ( $V$ ) of slurry casting electrode is  $V = \pi \times S$ ; the specific capacity ( $C_s$ ) of DNG/MoS<sub>2</sub> at 0.1  $\text{A g}^{-1}$  is 514  $\text{mAh g}^{-1}$ , the mass of DNG/MoS<sub>2</sub> ( $m$ ) is 1.2  $\text{mg}$ , the capacity delivered by DNG/MoS<sub>2</sub> in slurry casting slurry electrode ( $C$ ) is  $C = C_s \times m$ . Therefore, the volumetric capacity of slurry casting electrode ( $C_v$ ) can be calculated

by equation  $C_v = \frac{C}{V}$ , resulting in 770  $\text{mAh cm}^{-3}$  at 0.1  $\text{A g}^{-1}$ .

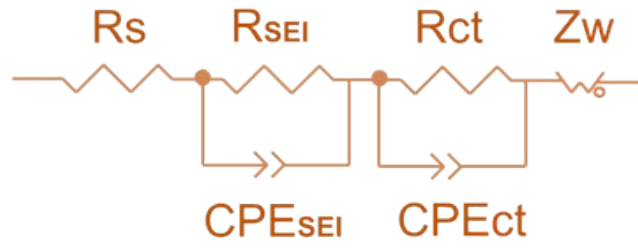

Fig. S17. Equivalent circuit for EIS spectra.

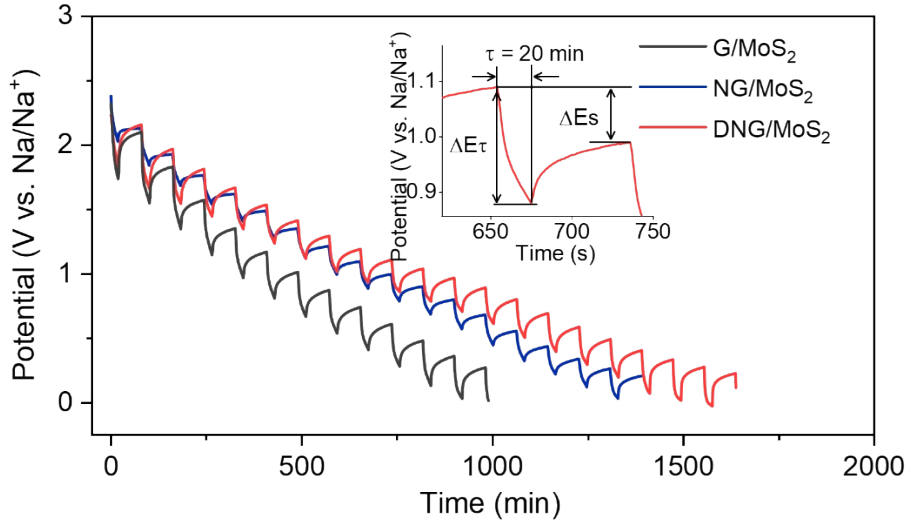

Fig. S18. Discharge GITT curves of DNG/MoS<sub>2</sub>, NG/MoS<sub>2</sub>, and G/MoS<sub>2</sub>. The cell was discharged at 0.1 A g<sup>-1</sup> for 20 min and then relaxed for 60 min to enable the potential equilibrium. The  $D_{Na}$  can be calculated by the simplified equation: <sup>3</sup>

$$D_{Na} = \frac{4}{\pi\tau} \left( \frac{m_B V_M}{M_B A} \right)^2 \left( \frac{\Delta E_S}{\Delta E_\tau} \right)^2$$

where  $\tau$  is the duration time of the current pulse,  $m_B$  is the mass of the active material (g),  $M_B$  is the molecular weight (g mol<sup>-1</sup>),  $V_M$  is the molar volume (cm<sup>3</sup> mol<sup>-1</sup>),  $A$  is the total contact area between electrode and electrolyte (cm<sup>2</sup>),  $\Delta E_\tau$  is the change of transient voltage (V), and  $\Delta E_S$  is related to the change of steady-state voltage for the corresponding step.

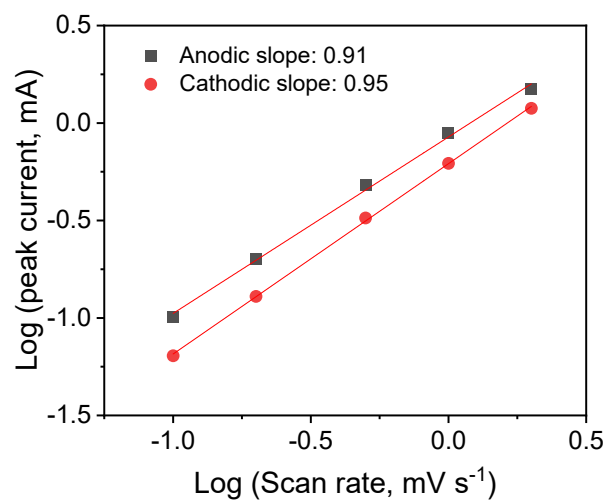

Fig. S19. Current response against the scan rates at peak potentials of DNG/MoS<sub>2</sub>.

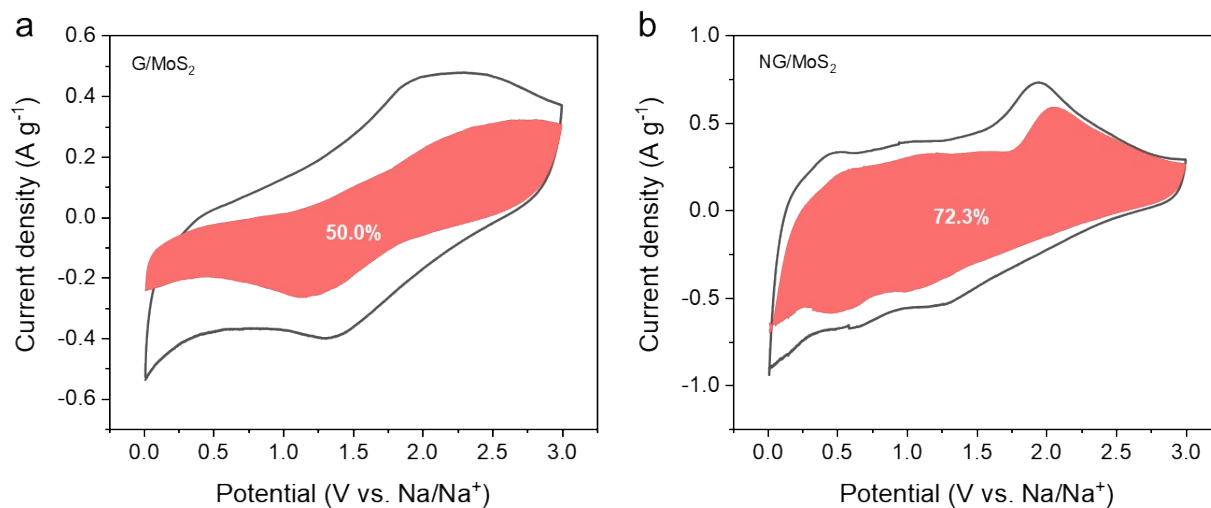

Fig. S20. Capacitive contributions of (a) G/MoS<sub>2</sub> and (b) NG/MoS<sub>2</sub> at 1 mV s<sup>-1</sup>. The quantitative capacitive contribution under the given scan rate is obtained based on the following equation:<sup>4</sup>

$$i = k_1 v + k_2 v^{1/2}$$

$$i/v^{1/2} = k_1 v^{1/2} + k_2$$

where  $k_1$  and  $k_2$  are appropriate values,  $i$  (A g<sup>-1</sup>) is current density,  $v$  (mV s<sup>-1</sup>) is scan rate, and  $k_1 v$  and  $k_2 v^{1/2}$  are capacitive contribution and diffusion contribution, respectively.

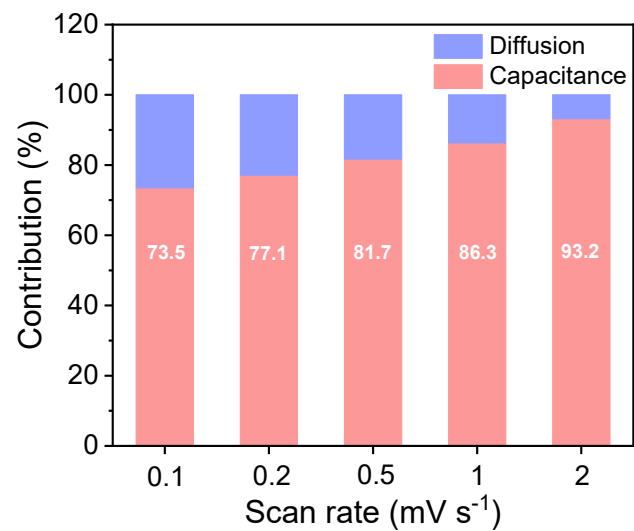

Fig. S21. Capacitance contributions for DNG/MoS<sub>2</sub> at different scan rates.



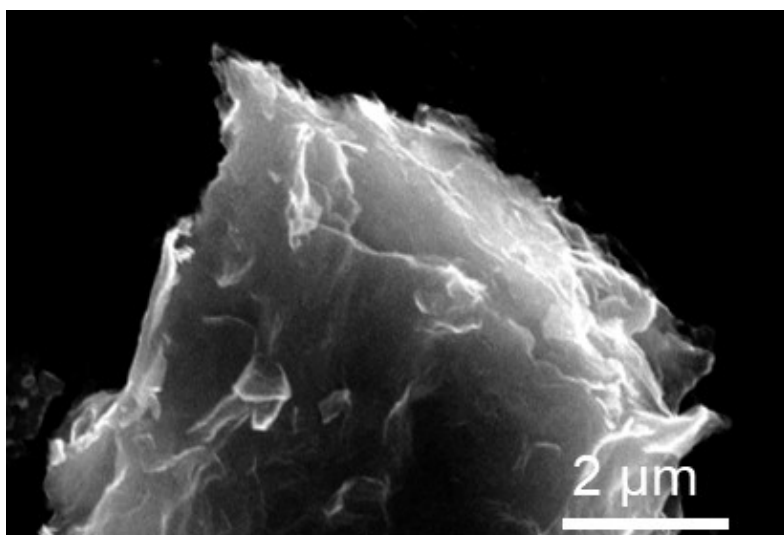

Fig. S22. SEM image of post-cycled DNG/MoS<sub>2</sub> electrode.

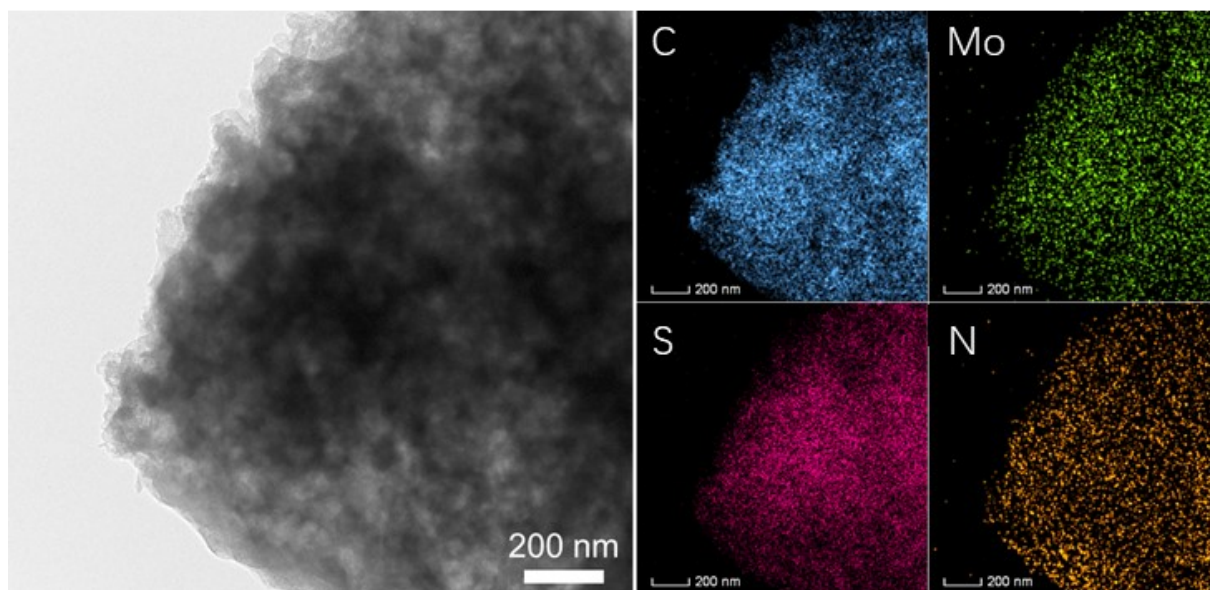

Fig. S23. TEM image and the corresponding element mappings of the post-cycled DNG/MoS<sub>2</sub>.

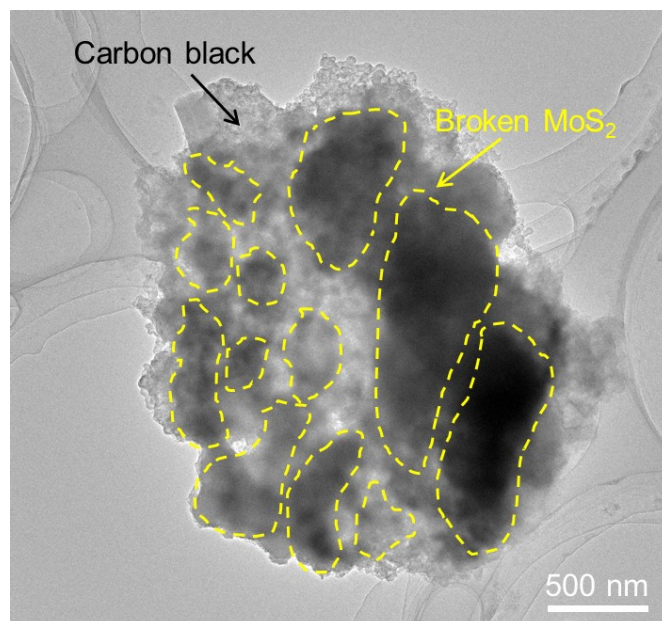

Fig. S24. TEM image of the post-cycled bare MoS<sub>2</sub> electrode.

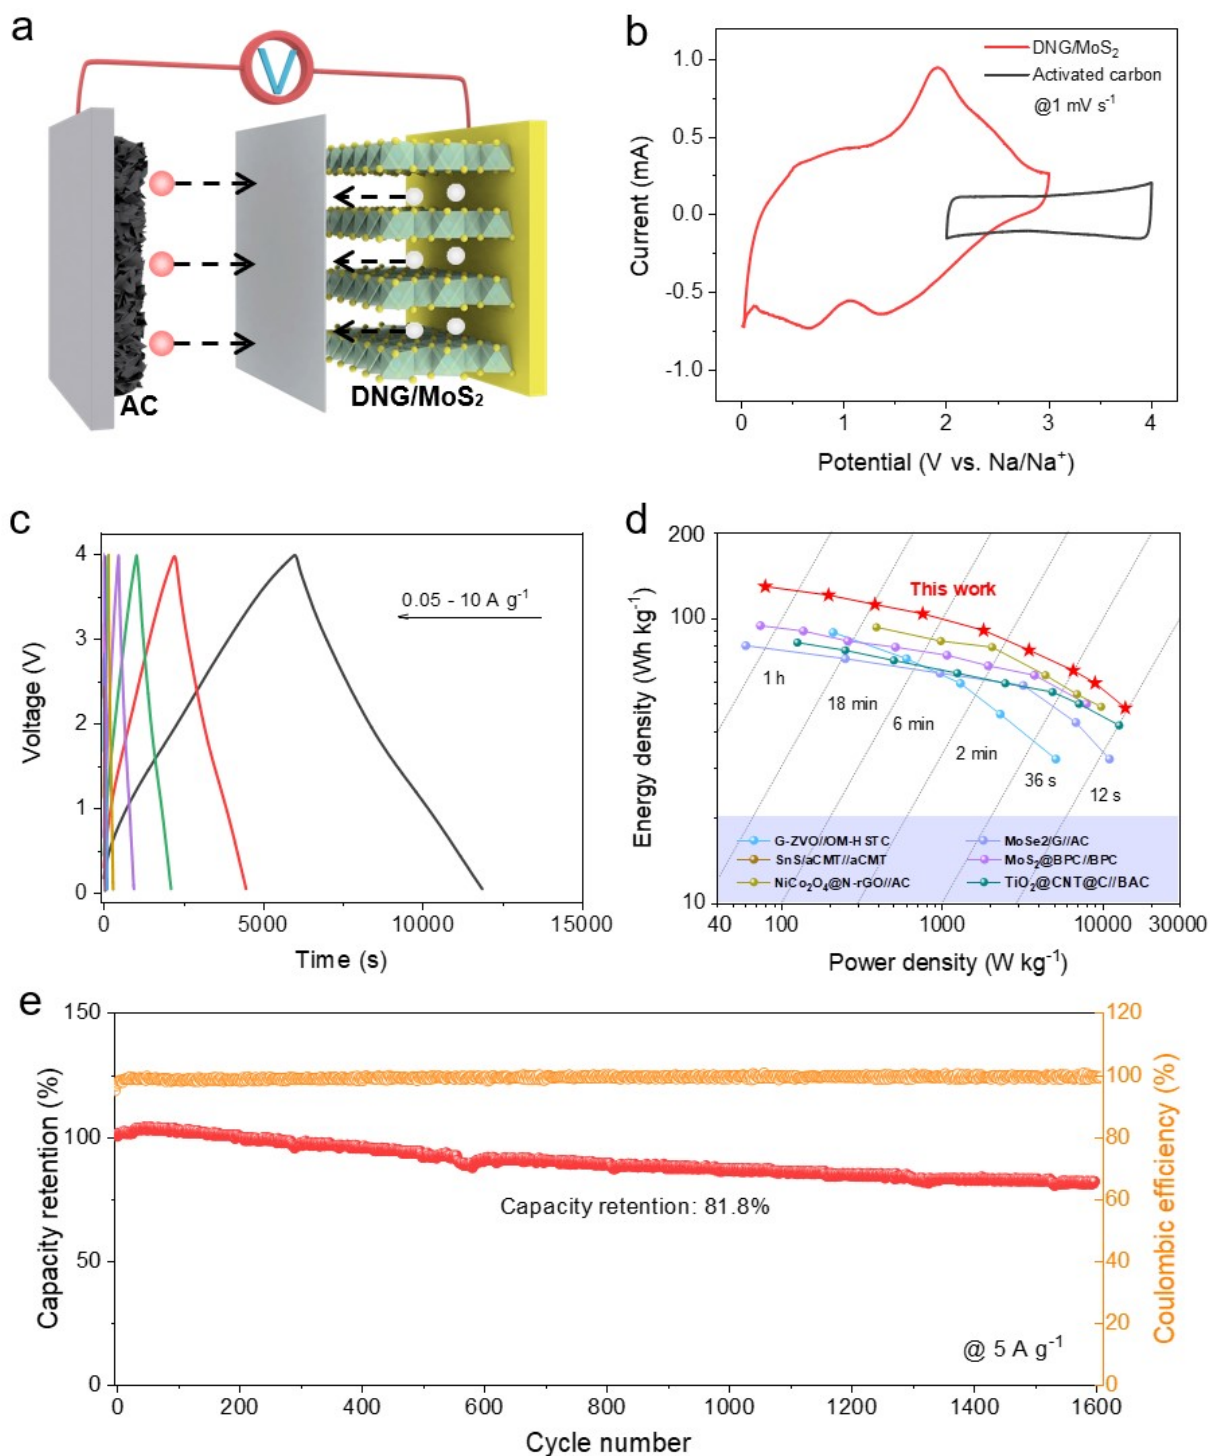

Fig. S25. (a) Schematic illustration of assembled activated carbon//DNG/MoS<sub>2</sub> SIC. (b) CV curves of activated carbon and DNG/MoS<sub>2</sub> at scan rate of 1 mV s<sup>-1</sup>. (c) Galvanostatic charge-discharge profiles of the SIC at current densities of 0.1-50 A g<sup>-1</sup>. (d) Comparison of Ragone plots of the activated carbon//DNG/MoS<sub>2</sub> SIC with previously reported SICs. (e) Cycle performance of as-assembled SIC at 5 A g<sup>-1</sup>.

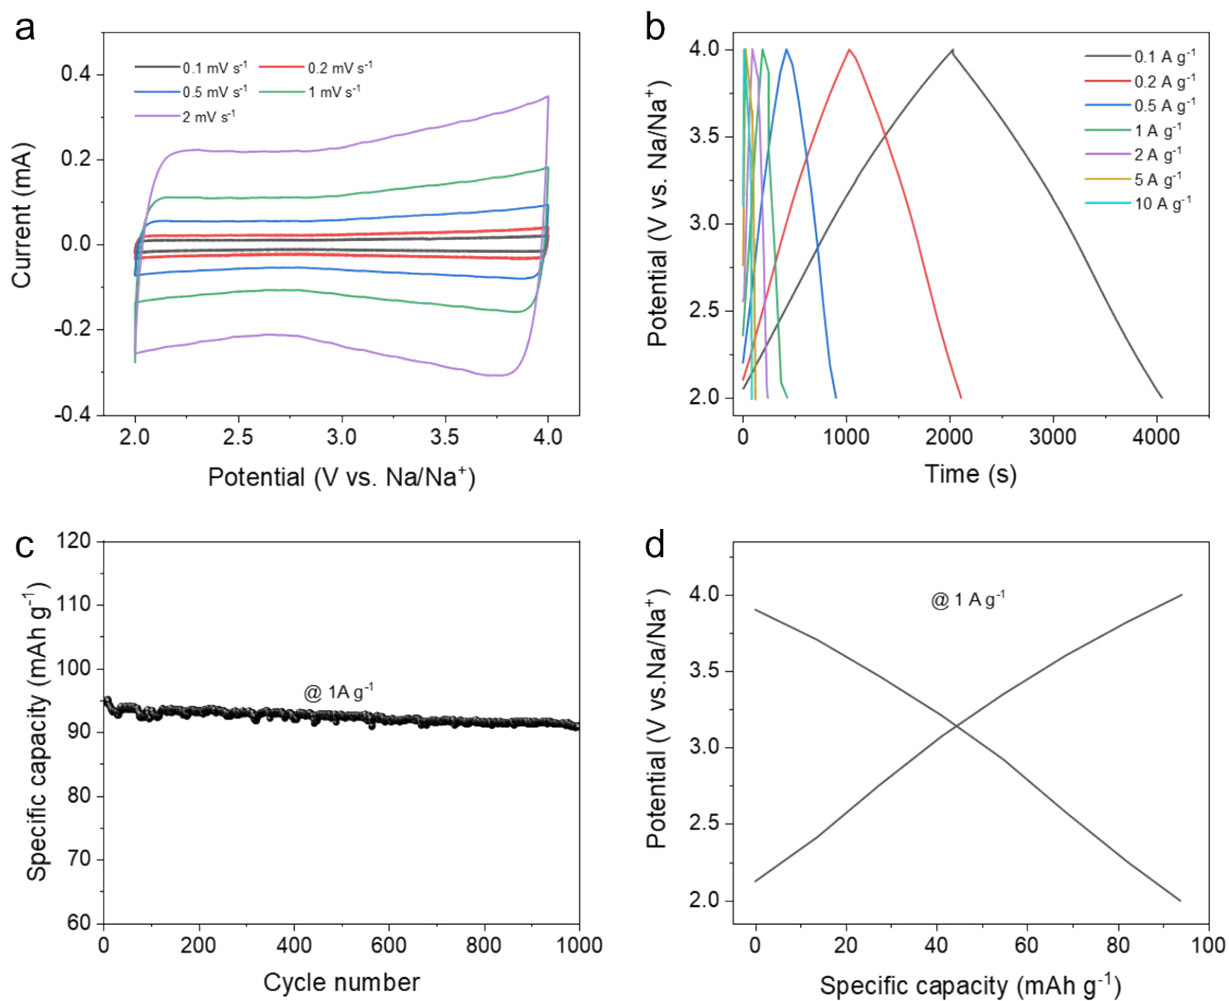

Fig. S26. The electrochemical performance of activated carbon at the potential window of 2-4 V in sodium half-cell: (a) CV curves at scan rates from 0.1 to 2 mV s<sup>-1</sup>, (b) discharge-charge profiles from 0.1 to 10 A g<sup>-1</sup>, (c) cycling performance at 1 A g<sup>-1</sup>, and (d) discharge-charge profiles at 1 A g<sup>-1</sup>.

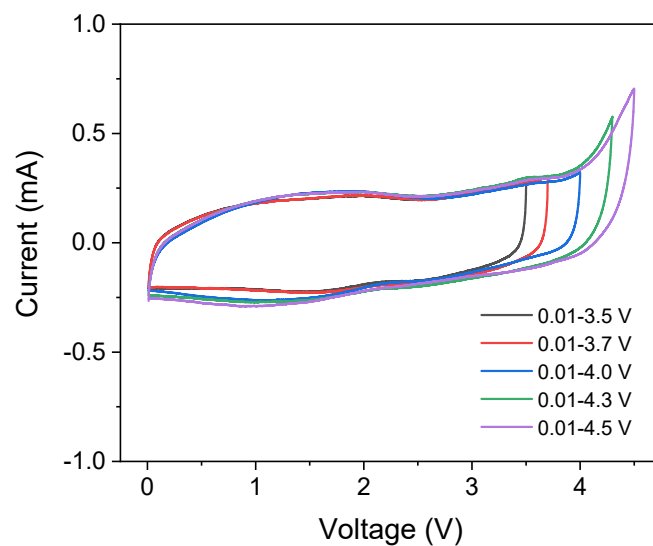

Fig. S27. CV curves of DNG/MoS<sub>2</sub>//activated carbon SIC with a minimum voltage of 0.01 V and various maximum voltage of 3.5-4.5 V at 1 mV s<sup>-1</sup>.

Table S1. The pore volumes and the specific surface areas of DNG/MoS<sub>2</sub>, NG/MoS<sub>2</sub>, G/MoS<sub>2</sub>, and D-Mo/PANI@GO.

| Samples              | Pore volume<br>(cm <sup>3</sup> g <sup>-1</sup> ) | Specific surface area<br>(m <sup>2</sup> g <sup>-1</sup> ) |
|----------------------|---------------------------------------------------|------------------------------------------------------------|
| DNG/MoS <sub>2</sub> | 0.086                                             | 37.3                                                       |
| NG/MoS <sub>2</sub>  | 0.086                                             | 54.3                                                       |
| G/MoS <sub>2</sub>   | 0.041                                             | 10.4                                                       |
| D-Mo/PANI@GO         | ---                                               | 8.6                                                        |



Table S2. The electrical conductivity of bare MoS<sub>2</sub> and DNG/MoS<sub>2</sub>.

| Samples               | Electrical conductivity (S cm <sup>-1</sup> ) |                       |                       | Average value<br>(S cm <sup>-1</sup> ) |
|-----------------------|-----------------------------------------------|-----------------------|-----------------------|----------------------------------------|
| Bare MoS <sub>2</sub> | 24.5*10 <sup>-6</sup>                         | 28.4*10 <sup>-6</sup> | 35.8*10 <sup>-6</sup> | 29.6*10 <sup>-6</sup>                  |
| DNG/MoS <sub>2</sub>  | 11.0                                          | 10.3                  | 9.8                   | 10.4                                   |

Table S3. The resistance values of DNG/MoS<sub>2</sub>, NG/MoS<sub>2</sub>, and G/MoS<sub>2</sub>.

| <b>Samples</b>             | <b>R<sub>s</sub> (Ω)</b> | <b>R<sub>ct</sub> (Ω)</b> | <b>Z<sub>w</sub> (Ω)</b> |
|----------------------------|--------------------------|---------------------------|--------------------------|
| <b>G/MoS<sub>2</sub></b>   | 3.8                      | 243.9                     | 595.0                    |
| <b>NG/MoS<sub>2</sub></b>  | 2.8                      | 453.8                     | 403.5                    |
| <b>DNG/MoS<sub>2</sub></b> | 2.2                      | 86.2                      | 194.2                    |

## ***Calculations***

Electrochemical calculations for the assembled sodium ion capacitor

The specific capacitance ( $F\ g^{-1}$ ) of sodium ion capacitor is calculated by the following equation:

$$C = \frac{I\Delta t}{\Delta V}$$

where  $I$  ( $A\ g^{-1}$ ) is the current density,  $\Delta t$  (s) is the discharge time, and  $\Delta V$  (V) is the voltage window.

The specific energy density ( $E$ ,  $Wh\ kg^{-1}$ ) and specific power density ( $P$ ,  $W\ kg^{-1}$ ) were calculated by the following equation:

$$E = \frac{1}{2}CV^2$$

$$P = \frac{E}{\Delta t}$$

where  $C$  ( $F\ g^{-1}$ ) is the specific capacitance,  $V$  is the voltage range of discharge process excluding the  $IR$  drop, and  $\Delta t$  (s) is the discharge time. Here, the energy density ( $Wh\ kg^{-1}$ ) and power density ( $W\ kg^{-1}$ ) of the SICs were calculated based on the total mass of cathode and anode.

## Reference

1. B. Chen, T. Wang, S. Zhao, J. Tan, N. Zhao, S. P. Jiang, Q. Zhang, G. Zhou and H.-M. Cheng, *Adv. Mater.*, 2021, **33**, 2007090.
2. B. Chen, H. Lu, J. Zhou, C. Ye, C. Shi, N. Zhao and S.-Z. Qiao, *Adv. Energy Mater.*, 2018, **8**, 1702909.
3. S. Li, Y. Liu, X. Zhao, Q. Shen, W. Zhao, Q. Tan, N. Zhang, P. Li, L. Jiao and X. Qu, 2021, *Adv. Mater.*, 2021, **33**, 2007480.
4. C. Zhao, C. Yu, M. Zhang, Q. Sun, S. Li, M. Norouzi Banis, X. Han, Q. Dong, J. Yang, G. Wang, X. Sun and J. Qiu, *Nano Energy*, 2017, **41**, 66-74.
